# Supplementary material
Source: ML conference proceedings conference paper supplement (https://proceedings.neurips.cc/paper_files/paper/2023/hash/fc30caeb45721bab13507c50199e6403-Abstract.html)
Supplement: Supplementary file 1 [file fc30caeb45721bab13507c50199e6403-Supplemental-Conference.pdf]

## 493 A Related work

494 Sequential probability assignment is a classic topic in information theory with extensive literature, see  
 495 the survey by [Merhav and Feder \[1998\]](#) and the references within. In particular, the idea of probability  
 496 assignments that are Bayesian mixtures over the reference class of distributions [[Krichevsky and](#)  
 497 [Trofimov, 1981](#)] is of central importance—such mixture probability assignments arise as the optimal  
 498 solution to several operational information theoretic and statistical problems [[Kamath et al., 2015](#)].  
 499 It is also known that the Bayesian mixture approach often outperforms the “plug-in” approach of  
 500 estimating a predictor from the reference class and then playing it [[Merhav and Feder, 1998](#)]. A  
 501 similar Bayesian mixture probability assignment in the contextual probability assignment problem  
 502 was used by [Bhatt and Kim \[2021\]](#), where the covering over the VC function class was obtained  
 503 in a *data-dependent manner*. This idea of using a mixture over an empirical covering along with a  
 504 so-called “add- $\beta$ ” probability assignment was then used by [Bilodeau et al. \[2021\]](#). Combining this  
 505 with the key idea of discretizing the class of functions as per the Hellinger divergence induced metric,  
 506 they obtained matching rates for several interesting classes in the *realizable* case (i.e.  $y_t|x_t$  generated  
 507 according to a fixed unknown distribution in the reference class); see also [Yang and Barron \[1999\]](#)  
 508 for more intuition behind usage of Hellinger coverings for stochastic data. Recent work of [Wu et al.](#)  
 509 [\[2022a,b\]](#) has also employed an empirical covering with an add- $\beta$  probability assignment for both  
 510 stochastic and adversarial adversaries.

511 A complementary approach, more common in the online learning literature is to study fundamental  
 512 limits of sequential decision making problems non-constructively (i.e. providing bounds on the  
 513 minmax regret without providing a probability assignment that achieves said regret). This sequen-  
 514 tial complexities based approach of [Rakhlin et al. \[2015b,a\]](#) has been employed for the log-loss  
 515 by [Rakhlin and Sridharan \[2015\]](#) and [Bilodeau et al. \[2020\]](#); however the latter suggests that sequential  
 516 complexities might not fully capture the log-loss problem.

517 Smoothed analysis, initiated by [Spielman and Teng \[2004\]](#) for the study of efficiency of algorithms  
 518 such as the simplex method, has recently shown to be effective in circumventing both statistical  
 519 and computational lower bounds in online learning for classification and regression [Haghtalab et al.](#)  
 520 [\[2021\]](#), [Rakhlin et al. \[2011\]](#), [Block et al. \[2022\]](#), [Haghtalab et al. \[2020\]](#), [Block and Simchowitz](#)  
 521 [\[2022\]](#). This line of work establishes that smoothed analysis is a viable line of attack to construct  
 522 statistically and computationally efficient algorithms for sequential decision making problems.

523 Due to the fundamental nature of the problem, the notion of computational efficiency for sequential  
 524 probability assignment and the closely related problem of portfolio selection has been considered in  
 525 the literature. [Kalai and Vempala \[2002\]](#) presents an efficient implementation of Cover’s universal  
 526 portfolio algorithm using techniques from Markov chain Monte Carlo. Recently, there has been a  
 527 flurry of interest in using follow the regularized leader (FTRL) type techniques to achieve low regret  
 528 and low complexity simultaneously [[Luo et al., 2018](#), [Zimmert et al., 2022](#), [Jézéquel et al., 2022](#)], see  
 529 also [Van Erven et al. \[2020\]](#) and the references within. However, none of these methods consider the  
 530 contextual version of the problem and are considerably different from the oracle-efficient approach.  
 531 On the other hand, work studying portfolio selection with contexts [[Cover and Ordentlich, 1996](#),  
 532 [Cross and Barron, 2003](#), [Györfi et al., 2006](#), [Bhatt et al., 2023](#)] does not take oracle-efficiency into  
 533 account.

534 **Concurrent Work:** [Wu et al. \[2023\]](#) also study the problem of sequential probability assignment  
 535 (and general mixable losses) and for VC classes achieve the optimal regret of  $O(d \log(T/\sigma))$ . In  
 536 addition to the smooth adversaries, they also studied general models capturing the setting where the  
 537 base measures are not known. They work primarily in the information theoretical setting and do not  
 538 present any results regarding efficient algorithms.

## 539 B Deferred Proof from Section 3

540 In order to obtain an upper bound on  $\mathcal{R}_T(\mathcal{F}, \sigma)$  in terms of  $\mathcal{R}_T^{kT}(\mathcal{F})$  for some  $k$ , we will consider (2)  
 541 and proceed inductively. The main idea is to note that since  $\mathcal{D}_i$  is  $\sigma$ -smoothed, conditioned on the  
 542 history thus far, we can invoke the coupling lemma given in [Theorem 2.1](#).

543 For the sake of illustration, first consider the simple case of  $T = 1$ . Let  $X_1, Z_1 \dots Z_k$  denote the  
 544 coupling alluded to in [Theorem 2.1](#). Recall that  $X_1 \sim \mathcal{D}_1$  and  $Z_{1:k} \sim \mu^k$ . Defining the event

545  $E_1 := \{X_1 \in Z_{1:k}\}$ , we have

$$\begin{aligned}
\mathcal{R}_1(\mathcal{F}, \mathcal{D}) &= \mathbb{E}_{X_1 \sim \mathcal{D}_1} \inf_{a_1} \sup_{y_1} \mathcal{R}_1(\mathcal{F}, X_1, y_1, a_1) \\
&= \mathbb{E}_{X_1, Z_{1:k}} \left[ \inf_{a_1} \sup_{y_1} \mathcal{R}_1(\mathcal{F}, X_1, y_1, a_1) \right] \\
&= \mathbb{E}_{X_1, Z_{1:k}} \left[ \mathbb{1}\{E_1\} \inf_{a_1} \sup_{y_1} \mathcal{R}_1(\mathcal{F}, X_1, y_1, a_1) \right] \\
&\quad + \mathbb{E}_{X_1, Z_{1:k}} \left[ \mathbb{1}\{E_1^c\} \inf_{a_1} \sup_{y_1} \mathcal{R}_1(\mathcal{F}, X_1, y_1, a_1) \right] \\
&\leq \mathbb{E}_{X_1, Z_{1:k}} \left[ \mathbb{1}\{E_1\} \inf_{a_1} \sup_{y_1} \mathcal{R}_1(\mathcal{F}, X_1, y_1, a_1) \right] + \mathbb{P}(E_1^c) \tag{3}
\end{aligned}$$

$$\leq \mathbb{E}_{Z_{1:k}} \left[ \max_{X_1 \in Z_{1:k}} \inf_{a_1} \sup_{y_1} \mathcal{R}_1(\mathcal{F}, X_1, y_1, a_1) \right] + (1 - \sigma)^k \tag{4}$$

$$= \underline{\mathcal{R}}_T^{kT}(\mathcal{F}) + (1 - \sigma)^k, \tag{5}$$

546 where (3) uses that  $\inf_{a_1} \sup_{y_1} \mathcal{R}_1(\mathcal{F}, X_1, y_1, a_1) \leq 1$ <sup>4</sup>, (4) follows by the coupling lemma and (5)  
547 follows from the definition of transductive learning regret. The next step is to generalize this to  
548 arbitrary  $T$ . The key aspect that makes this possible is that for all  $t \leq T$ , we have  $D_t \in \Delta_\sigma(\mu)$ ,  
549 even conditioned on the past, allowing us to apply the coupling lemma. Furthermore, we need that  
550  $\mathcal{R}_T \leq T$  for arbitrary sequences which is indeed guaranteed for reasonable losses such as the log-loss  
551 as noted above.

552 We now move to general case. We will prove this inductively. Assume that we have used the coupling  
553 lemma till time  $t - 1$  and replaced the samples from the smooth distributions with samples from the  
554 uniform. That is assume the induction hypothesis, for time  $t$  as

$$\begin{aligned}
\mathcal{R}_T &\leq \mathbb{E}_{\{Z_{1:k}\} \sim \mu} \max_{X_1 \in Z_1^k} \inf_{a_1} \sup_{y_1} \dots \sup_{\mathcal{D}_t} \mathbb{E}_{X_t \sim \mathcal{D}_t} \inf_{a_t} \sup_{y_t} \dots \\
&\quad \dots \sup_{\mathcal{D}_T} \mathbb{E}_{X_T \sim \mathcal{D}_T} \inf_{a_T} \sup_{y_T} \mathcal{R}(\mathcal{F}, X_{1:T}, y_{1:T}, a_{1:T}) + T(t - 1)(1 - \sigma)^k
\end{aligned}$$

555 Using the coupling lemma, we have that there exists a coupling  $\Pi_t$  such that  $X_t, Z_{t,1} \dots Z_{t,k} \sim \Pi_t$   
556 and an event  $E_t = \{X_t \in \{Z_{t,1} \dots Z_{t,k}\}\}$  that occurs with probability  $1 - (1 - \sigma)^k$ . Using  
557  $Z_t := \{Z_{t,1} \dots Z_{t,k}\}$  we have

$$\begin{aligned}
&\mathbb{E}_{Z_1 \sim \mu^k} \max_{X_1 \in Z_1} \inf_{a_1} \sup_{y_1} \dots \sup_{\mathcal{D}_t} \mathbb{E}_{X_t \sim \mathcal{D}_t} \inf_{a_t} \sup_{y_t} \dots \sup_{\mathcal{D}_T} \mathbb{E}_{X_T \sim \mathcal{D}_T} \inf_{a_T} \sup_{y_T} \mathcal{R}(\mathcal{F}, X_{1:T}, y_{1:T}, a_{1:T}) \\
&\leq \mathbb{E}_{Z_1 \sim \mu^k} \max_{X_1 \in Z_1} \inf_{a_1} \sup_{y_1} \dots \sup_{\mathcal{D}_t} \mathbb{E}_{X_t, Z_t \sim \Pi_t} \inf_{a_t} \sup_{y_t} \dots \sup_{\mathcal{D}_T} \mathbb{E}_{X_T \sim \mathcal{D}_T} \inf_{a_T} \sup_{y_T} \mathcal{R}(\mathcal{F}, X_{1:T}, y_{1:T}, a_{1:T}) \\
&\leq \mathbb{E}_{Z_1 \sim \mu^k} \max_{X_1 \in Z_1} \inf_{a_1} \sup_{y_1} \dots \sup_{\mathcal{D}_t} \mathbb{E}_{X_t, Z_t \sim \Pi_t} \left[ \mathbb{1}[E_t] \left( \inf_{a_t} \sup_{y_t} \dots \sup_{\mathcal{D}_T} \mathbb{E}_{X_T \sim \mathcal{D}_T} \inf_{a_T} \sup_{y_T} \mathcal{R}(\mathcal{F}, X_{1:T}, y_{1:T}, a_{1:T}) \right) \right] \\
&\quad + \mathbb{E}_{Z_1 \sim \mu^k} \max_{X_1 \in Z_1} \inf_{a_1} \sup_{y_1} \dots \sup_{\mathcal{D}_t} \mathbb{E}_{X_t, Z_t \sim \Pi_t} \left[ \mathbb{1}[E_t^c] \left( \inf_{a_t} \sup_{y_t} \dots \sup_{\mathcal{D}_T} \mathbb{E}_{X_T \sim \mathcal{D}_T} \inf_{a_T} \sup_{y_T} \mathcal{R}(\mathcal{F}, X_{1:T}, y_{1:T}, a_{1:T}) \right) \right] \\
&\leq \mathbb{E}_{Z_1 \sim \mu^k} \max_{X_1 \in Z_1} \inf_{a_1} \sup_{y_1} \dots \sup_{\mathcal{D}_t} \mathbb{E}_{X_t, Z_t \sim \Pi_t} \left[ \mathbb{1}[E_t] \left( \inf_{a_t} \sup_{y_t} \dots \sup_{\mathcal{D}_T} \mathbb{E}_{X_T \sim \mathcal{D}_T} \inf_{a_T} \sup_{y_T} \mathcal{R}(\mathcal{F}, X_{1:T}, y_{1:T}, a_{1:T}) \right) \right] \\
&\quad + T(1 - \sigma)^k
\end{aligned}$$

---

<sup>4</sup>This holds for the log-loss by using the trivial strategy of using a uniform probability assignment at each step.

$$\begin{aligned}
&\leq \mathbb{E}_{Z_1 \sim \mu^k} \max_{X_1 \in Z_1} \inf_{a_1} \sup_{y_1} \dots \sup_{\mathcal{D}_t} \mathbb{E}_{Z_t \sim \Pi_t} \max_{X_t \in Z_t} \left( \inf_{a_t} \sup_{y_t} \dots \sup_{\mathcal{D}_T} \mathbb{E}_{X_T \sim \mathcal{D}_T} \inf_{a_T} \sup_{y_T} \mathcal{R}(\mathcal{F}, X_{1:T}, y_{1:T}, a_{1:T}) \right) \\
&\quad + T(1 - \sigma)^k \\
&= \mathbb{E}_{Z_1 \sim \mu^k} \max_{X_1 \in Z_1} \inf_{a_1} \sup_{y_1} \dots \mathbb{E}_{Z_t \sim \mu^k} \max_{X_t \in Z_t} \left( \inf_{a_t} \sup_{y_t} \dots \sup_{\mathcal{D}_T} \mathbb{E}_{X_T \sim \mathcal{D}_T} \inf_{a_T} \sup_{y_T} \mathcal{R}(\mathcal{F}, X_{1:T}, y_{1:T}, a_{1:T}) \right) \\
&\quad + T(1 - \sigma)^k
\end{aligned}$$

Combining with the induction hypothesis, gives us the induction hypothesis for the next  $t$  as required. The desired result follows by upper bounding the average with the supremum over all subsets of size  $kT$ .

## C Proof of Theorem 3.2

First, recall the notion of the global sequential covering for a class Wu et al. [2022b].

**Definition C.1** (Global Sequential Covering Wu et al. [2022b]). For any class  $\mathcal{F}$ , we say that  $\mathcal{F}'_\alpha \subset \mathcal{X}^* \rightarrow [0, 1]$  is a global sequential  $\alpha$ -covering of  $\mathcal{F}$  at scale  $T$  if for any sequence  $x_{1:T}$  and  $h \in \mathcal{F}$ , there is a  $h' \in \mathcal{F}'$  such that for all  $i$ ,

$$|h(x_i) - h'(x_{1:i})| \leq \alpha.$$

**Theorem C.1** (Wu et al. [2022b]). If  $\mathcal{F}'_\alpha$  is a global sequential  $\alpha$ -covering of  $\mathcal{F}$  at scale  $T$ , then

$$\mathcal{R}_T(\mathcal{F}) \leq \inf_{\alpha > 0} \left\{ 2\alpha T + \log |\mathcal{F}'_\alpha| \right\}.$$

To finish the proof note that a  $\epsilon$ -cover in the sense of Definition 3.1 gives a global sequential cover in the sense of Definition C.1.

## D VC Classes

In this section, we construct a probability assignment for the case when  $\mathcal{F} \subset \{\mathcal{X} \rightarrow [0, 1]\}$  is a VC class. To motivate this probability assignment, consider the no-context case, which is a classic problem in information theory, where the (asymptotically) optimal probability assignment is known to be the Krichevsky and Trofimov [1981] (KT) probability assignment which is a Bayesian mixture of the form

$$q_{\text{KT}}(y_{1:T}) = \int_0^1 p_\theta(y_{1:T}) w(\theta) d\theta$$

for a particular prior  $w(\theta)$ . This can be written sequentially as  $q_{\text{KT}}(1|y_{1:t-1}) = \frac{\sum_{i=1}^{t-1} y_i + 1/2}{t-1+1}$  leading to it sometimes being called the add-1/2 probability assignment; by choosing  $w(\theta)$  to be Beta( $\beta, \beta$ ) prior one can achieve a corresponding add- $\beta$  probability assignment. We extend the mixture idea to the contextual case. In particular, for functions  $f_1, \dots, f_m \in \mathcal{F}$ , one can choose a mixture probability assignment as<sup>5</sup>

$$\prod_{i=1}^t q(y_i | x_{1:i}, y_{1:i-1}) =: q(y_{1:t} | x_{1:t}) = \frac{1}{m} \sum_{j=1}^m \prod_{i=1}^t \left( \frac{p_{f_j}(y_i | x_i) + \beta}{1 + 2\beta} \right).$$

This is the approach employed presently with a carefully chosen  $f_1, \dots, f_m$ . We remark that for VC classes this mixture approach may be extended to any mixable [Cesa-Bianchi and Lugosi, 2006, Chapter 3] loss.

<sup>5</sup>Note that once a mixture  $q(y_{1:t} | x_{1:t})$  has been defined for arbitrary  $x_{1:t}, y_{1:t}$ , the probability assignment at time  $t$  (or equivalently, the predicted probability with which the upcoming bit is 1) can be defined as  $q(1 | x_{1:t}, y_{1:t-1}) = \frac{q(y_{1:t-1} 1 | x_{1:t})}{q(y_{1:t-1} | x_{1:t-1})}$ ; in particular, this prediction depends only on the observed history  $x_{1:t}, y_{1:t-1}$  and not the future  $y_t$ .

First consider VC classes more carefully: i.e. each  $f \in \mathcal{F}^{\text{VC}}$  is characterized by three things: a set  $A \subseteq \mathcal{X}$ , where  $A \in \mathcal{A} \subset 2^{\mathcal{X}}$  with the VC dimension of the collection  $\mathcal{A}$  being  $d < \infty$ ; as well as two numbers  $\theta_0, \theta_1 \in [0, 1]$ . Then, we have

$$f_{A, \theta_0, \theta_1}(x) = \theta_0 \mathbb{1}\{x \in A\} + \theta_1 \mathbb{1}\{x \in A^C\}.$$

The following equivalent representation of this hypothesis class is more convenient to use. We consider each  $f$  to be characterized by a tuple  $f = (g, \theta_0, \theta_1)$  where

1.  $\theta_0, \theta_1 \in [0, 1]$
2.  $g \in \mathcal{G} \subset \{\mathcal{X} \rightarrow \{0, 1\}\}$ .

In other words,  $g$  belongs to a class  $\mathcal{G}$  of binary functions—this is simply the class of functions  $\{x \mapsto \mathbb{1}\{x \notin A\} \mid A \in \mathcal{A}\}$  in the original notation; so that clearly  $\text{VCdim}(\mathcal{G}) = d$ . Then, we have  $p_f(\cdot|x) = p_{g, \theta_0, \theta_1}(\cdot|x) = \text{Bernoulli}(\theta_0)$  if  $g(x) = 0$ ; and  $p_{g, \theta_0, \theta_1}(\cdot|x) = \text{Bernoulli}(\theta_1)$  otherwise.

Recalling the definition of regret against a particular  $f = (g, \theta_0, \theta_1)$  for a sequential probability assignment strategy  $\mathcal{Q} = \{q(\cdot|x_{1:t}, y_{1:t-1})\}_{t=1}^T$

$$\begin{aligned} \mathcal{R}_T(f, x_{1:T}, y_{1:T}, \mathcal{Q}) &= \sum_{t=1}^T \log \frac{1}{q(y_t|x_{1:t}, y_{1:t-1})} - \sum_{t=1}^T \log \frac{1}{p_f(y_t|x_t)} \\ &= \log \frac{p_f(y_{1:T}|x_{1:T})}{q(y_{1:T}|x_{1:T})} \end{aligned} \quad (6)$$

where  $q(y_{1:T}|x_{1:T}) := \prod_{t=1}^T q(y_t|x_{1:t}, y_{1:t-1})$ .

In the smoothed analysis case, we have  $X_t \sim \mathcal{D}_t$  where  $\mathcal{D}_t$  for all  $t$  is  $\sigma$ -smoothed. Recall that in this case, we are concerned with the regret

$$\begin{aligned} \mathcal{R}_T(\mathcal{F}, \sigma, \mathcal{Q}) &= \max_{\mathcal{D}: \sigma\text{-smoothed}} \mathbb{E}_{X_{1:T}} \left[ \max_{y_{1:T}} \sup_{f \in \mathcal{F}} \frac{p_f(y_{1:T}|X_{1:T})}{q(y_{1:T}|X_{1:T})} \right] \\ &= \max_{\mathcal{D}: \sigma\text{-smoothed}} \mathbb{E}_{X_{1:T}} \left[ \max_{y_{1:T}} \sup_{g \in \mathcal{G}} \max_{\theta_0, \theta_1} \frac{p_{g, \theta_0, \theta_1}(y_{1:T}|X_{1:T})}{q(y_{1:T}|X_{1:T})} \right]. \end{aligned}$$

## D.1 Proposed probability assignment

Let  $\mu$  be the dominating measure for the  $\sigma$ -smoothed distribution of  $X_{1:T}$ . Let  $g_1, \dots, g_{m_\epsilon} \in \mathcal{G}$  be an  $\epsilon$ -cover of the function class  $\mathcal{G}$  under the metric  $\delta_\mu(g_1, g_2) = \Pr_{X \sim \mu}(g_1(X) \neq g_2(X))$ . The following lemma bounds  $m_\epsilon$ .

**Lemma D.1** (Covering number of VC classes under the metric  $\delta$ , [Vershynin \[2018\]](#)).

$$m_\epsilon \leq \left( \frac{1}{\epsilon} \right)^{cd}$$

for an absolute constant  $c$ .

Following the idea of using a mixture probability assignment, we take a uniform mixture over  $g_1, \dots, g_{m_\epsilon}$  and  $\theta_0, \theta_1$  so that

$$q(y_{1:t}|x_{1:t}) = \frac{1}{m_\epsilon} \sum_{i=1}^{m_\epsilon} \int_0^1 \int_0^1 p_{g_i, \theta_0, \theta_1}(y_{1:t}|x_{1:t}) d\theta_0 d\theta_1$$

and consequently the sequential probability assignment (or equivalently, the probability assigned to 1) is

$$q(1|x_{1:t}, y_{1:t-1}) = \frac{q(y_{1:t-1}1|x_{1:t})}{q(y_{1:t-1}|x_{1:t-1})}.$$

One can observe that  $q(0|x_{1:t}, y_{1:t-1}), q(1|x_{1:t}, y_{1:t-1}) > 0$  and  $q(0|x_{1:t}, y_{1:t-1}) + q(1|x_{1:t}, y_{1:t-1}) = 1$  so that  $q$  is a legitimate probability assignment. Let the strategy induced by this uniform mixture be called  $\mathcal{Q}^{\text{VC}}$ .

## 610 D.2 Analysis of $\mathcal{Q}^{\text{VC}}$ for smoothed adversaries

611 We note from (6) that for the  $\mathcal{Q}^{\text{VC}}$  as defined in the last section, we have

$$\begin{aligned} \mathcal{R}_T((g^*, \theta_0^*, \theta_1^*), x_{1:T}, y_{1:T}, \mathcal{Q}^{\text{VC}}) &= \log m_\epsilon + \log \frac{p_{g^*, \theta_0^*, \theta_1^*}(y_{1:T}|x_{1:T})}{\sum_{i=1}^{m_\epsilon} \int_0^1 \int_0^1 p_{g_i, \theta_0, \theta_1}(y_{1:T}|x_{1:T}) d\theta_0 d\theta_1} \\ &\leq \log m_\epsilon + \log \frac{p_{g^*, \theta_0^*, \theta_1^*}(y_{1:T}|x_{1:T})}{\int_0^1 \int_0^1 p_{g_{i^*}, \theta_0, \theta_1}(y_{1:T}|x_{1:T}) d\theta_0 d\theta_1} \end{aligned} \quad (7)$$

612 where  $g_{i^*} \in \{g_1, \dots, g_{m_\epsilon}\}$  is the function  $i^* \in [m]$  that minimizes the Hamming distance between  
613 the binary strings  $(g_{i^*}(x_1), \dots, g_{i^*}(x_T))$  and  $(g^*(x_1), \dots, g^*(x_T))$ .

614 We now take a closer look at the second term of (7). Firstly, note that for any  $(g, \theta_0, \theta_1)$  we have

$$\begin{aligned} 615 \quad p_{g, \theta_0, \theta_1}(y_{1:T}|x_{1:T}) &= \\ \prod_{t=1}^T p_{g, \theta_0, \theta_1}(y_t|x_t) &= \prod_{t=1}^T \theta_{g(x_t)}^{y_t} (1 - \theta_{g(x_t)})^{1-y_t} = \prod_{t: g(x_t)=0} \theta_0^{y_t} (1 - \theta_0)^{1-y_t} \prod_{t: g(x_t)=1} \theta_1^{y_t} (1 - \theta_1)^{1-y_t} \\ &= \theta_0^{k_0(g; x_{1:T}, y_{1:T})} (1 - \theta_0)^{n_0(g; x_{1:T}) - k_0(g; x_{1:T}, y_{1:T})} \\ &\quad \theta_1^{k_1(g; x_{1:T}, y_{1:T})} (1 - \theta_1)^{n_1(g; x_{1:T}) - k_1(g; x_{1:T}, y_{1:T})}, \end{aligned}$$

616 where for  $j \in \{0, 1\}$

$$\begin{aligned} k_j(g; x_{1:T}, y_{1:T}) &= |\{t : y_t = 1, g(x_t) = j\}| \\ n_j(g; x_{1:T}) &= |\{t : g(x_t) = j\}|. \end{aligned}$$

617 Next, we note that for any  $g \in \mathcal{G}$

$$\begin{aligned} &\int_0^1 \int_0^1 p_{g, \theta_0, \theta_1}(y_{1:T}|x_{1:T}) d\theta_0 d\theta_1 \\ &= \left( \int_0^1 \theta_0^{k_0(g; x_{1:T}, y_{1:T})} (1 - \theta_0)^{n_0(g; x_{1:T}) - k_0(g; x_{1:T}, y_{1:T})} d\theta_0 \right) \\ &\quad \left( \int_0^1 \theta_1^{k_1(g; x_{1:T}, y_{1:T})} (1 - \theta_1)^{n_1(g; x_{1:T}) - k_1(g; x_{1:T}, y_{1:T})} d\theta_1 \right) \\ &= \frac{1}{\binom{n_0(g; x_{1:T})}{k_0(g; x_{1:T}, y_{1:T})} (n_0(g; x_{1:T}) + 1)} \frac{1}{\binom{n_1(g; x_{1:T})}{k_1(g; x_{1:T}, y_{1:T})} (n_1(g; x_{1:T}) + 1)} \\ &\geq \frac{1}{n^2 \binom{n_0(g; x_{1:T})}{k_0(g; x_{1:T}, y_{1:T})} \binom{n_1(g; x_{1:T})}{k_1(g; x_{1:T}, y_{1:T})}} \end{aligned} \quad (8)$$

618 where (8) follows from properties of the Laplace probability assignment (or that of the Beta/Gamma  
619 functions), captured by [Lemma D.2](#).

620 **Lemma D.2.** For  $k \leq n \in \mathbb{N}$ ,

$$\int_0^1 t^k (1-t)^{n-k} dt = \frac{\Gamma(k+1)\Gamma(n-k+1)}{\Gamma(n+2)} = \frac{1}{(n+1)\binom{n}{k}}$$

621 where  $\Gamma(\cdot)$  represents the Gamma function.

622 Putting this back into (7) (and rearranging), we have

$$\begin{aligned} &\mathcal{R}_T((g^*, \theta_0^*, \theta_1^*), x_{1:T}, y_{1:T}, \mathcal{Q}^{\text{VC}}) - \log m_\epsilon - 2 \log n \\ &\leq \sum_{j \in \{0, 1\}} \log \left( \binom{n_j(g_{i^*}; x_{1:T})}{k_j(g_{i^*}; x_{1:T}, y_{1:T})} (\theta_j^*)^{k_j(g^*; x_{1:T}, y_{1:T})} (1 - \theta_j^*)^{n_j(g^*; x_{1:T}) - k_j(g^*; x_{1:T}, y_{1:T})} \right) \\ &= \sum_{j \in \{0, 1\}} \log \left( \binom{n_j(g_{i^*}; x_{1:T})}{k_j(g_{i^*}; x_{1:T}, y_{1:T})} \binom{n_j(g^*; x_{1:T})}{k_j(g^*; x_{1:T}, y_{1:T})} \right)^{-1}. \end{aligned}$$

$$\begin{aligned}
& \binom{n_j(g^*; x_{1:T})}{k_j(g^*; x_{1:T}, y_{1:T})} (\theta_j^*)^{k_j(g^*; x_{1:T}, y_{1:T})} (1 - \theta_j^*)^{n_j(g^*; x_{1:T}) - k_j(g^*; x_{1:T}, y_{1:T})} \\
& \leq \sum_{j \in \{0,1\}} \log \left( \binom{n_j(g_{i^*}; x_{1:T})}{k_j(g_{i^*}; x_{1:T}, y_{1:T})} \binom{n_j(g^*; x_{1:T})}{k_j(g^*; x_{1:T}, y_{1:T})}^{-1} \right) \tag{9}
\end{aligned}$$

where (9) follows since for any natural numbers  $k \leq n$  and  $\theta \in [0, 1]$  we have  $\binom{n}{k} \theta^k (1 - \theta)^{n-k} \leq 1$ .  
Now, note that

$$\begin{aligned}
\log \frac{\binom{n}{k}}{\binom{n'}{k'}} &= \log \frac{n!}{n'!} + \log \frac{k'!}{k!} + \log \frac{(n' - k')!}{(n - k)!} \\
&\leq \log \frac{(n' + |n - n'|)!}{n'!} + \log \frac{(k + |k - k'|)!}{k!} + \log \frac{((n - k) + |n - n'| + |k - k'|)!}{(n - k)!}
\end{aligned}$$

If  $|k - k'|, |n - n'| \leq \delta$ , and  $\max\{n, n'\} \leq N$  then by for example [Bhatt and Kim, 2021, Proposition 6] we have that

$$\begin{aligned}
\log \frac{\binom{n}{k}}{\binom{n'}{k'}} &\leq 2\delta \log(n' + 2\delta) + 2\delta \log(k + 2\delta) + 4\delta \log((n - k) + 4\delta) \\
&\leq 16\delta \log N. \tag{10}
\end{aligned}$$

We now wish to use this bound in (9). For this, we will recall the definitions of  $n_0(g; x_{1:T})$  and  $k_0(g; x_{1:T}, y_{1:T})$  for a particular function  $g$  and observe that for two functions  $g, g'$  we have that both  $|n_0(g; x_{1:T}) - n_0(g'; x_{1:T})|, |k_0(g; x_{1:T}, y_{1:T}) - k_0(g'; x_{1:T}, y_{1:T})| \leq d_H(g(x_{1:T}), g'(x_{1:T}))$  where  $d_H(\cdot, \cdot)$  denotes the Hamming distance and  $g(x_{1:T}) := (g(x_1), \dots, g(x_T)) \in \{0, 1\}^T$ . Thus, by using (10) in (9) with  $\delta = d_H(g^*(x_{1:T}), g_{i^*}(x_{1:T}))$ ,  $N = T$ , we get

$$\mathcal{R}_T((g^*, \theta_0^*, \theta_1^*), x_{1:T}, y_{1:T}, \mathcal{Q}^{\text{VC}}) \leq \log m_\epsilon + 2 \log T + 32 d_H(g^*(x_{1:T}), g_{i^*}(x_{1:T})) \log T. \tag{11}$$

Note that (11) has effectively removed any dependence on  $y, \theta_0^*, \theta_1^*$ . We then have for some absolute constant  $C$ , (recalling the definition of  $i^*$  and  $\mathcal{F}$  from earlier)

$$\mathcal{R}_T(\mathcal{F}, \sigma, \mathcal{Q}^{\text{VC}}) \leq C \log m_\epsilon + C \log T \max_{\mathcal{D}: \sigma\text{-smoothed}} \mathbb{E} \left[ \sup_{g^* \in \mathcal{G}} \min_{i \in [m_\epsilon]} d_H(g^*(X_{1:T}), g_i(X_{1:T})) \right]. \tag{12}$$

Finally, we can control the last term in (12) by the following result, which follows from the coupling lemma and variance sensitive upper bounds on suprema over VC classes.

**Lemma D.3** (Lemma 3.3 of Haghtalab et al. [2021]).

$$\mathbb{E} \left[ \sup_{g^* \in \mathcal{G}} \min_{i \in [m]} d_H(g^*(X_{1:T}), g_i(X_{1:T})) \right] \leq \sqrt{\frac{\epsilon}{\sigma} T \log T d \log \left( \frac{1}{\epsilon} \right)} + T \log T \frac{\epsilon}{\sigma}$$

Plugging the above into (12) and taking  $\epsilon = \frac{\sigma}{T^2}$  gives us

$$\mathcal{R}_T(\mathcal{F}, \sigma, \mathcal{Q}^{\text{VC}}) \leq O \left( d \log \left( \frac{T}{\sigma} \right) \right).$$

## E Proof of Lemma 4.2

*Proof.* Note that this proof holds for general loss functions. Let  $\mathcal{R}_T$  denote the regret.

$$\begin{aligned}
\mathcal{R}_T &\leq \mathbb{E} \left[ \sum_{i=1}^T \ell(h_t, s_t) - \inf_{h \in \mathcal{F}} \sum_{i=1}^T \ell(h, s_t) \right] \\
&= \mathbb{E} \left[ \sum_{i=1}^T \ell(h_t, s_t) - \sum_{t=1}^T \ell(h_{t+1}, s_t) + \sum_{t=1}^T \ell(h_{t+1}, s_t) - \inf_{h \in \mathcal{F}} \sum_{i=1}^T \ell(h, s_t) \right]
\end{aligned}$$

$$= \mathbb{E} \left[ \sum_{i=1}^T \ell(h_t, s_t) - \sum_{t=1}^T \ell(h_{t+1}, s_t) \right] + \mathbb{E} \left[ \sum_{t=1}^T \ell(h_{t+1}, s_t) - \inf_{h \in \mathcal{F}} \sum_{i=1}^T \ell(h, s_i) \right]$$

639 Let us focus on the second term.

$$\begin{aligned} & \mathbb{E} \left[ \sum_{t=1}^T \ell(h_{t+1}, s_t) - \inf_{h \in \mathcal{F}} \sum_{i=1}^T \ell(h, s_i) \right] \\ & \leq \mathbb{E} \left[ \sum_{t=1}^T \ell(h_{t+1}, s_t) - \inf_{h \in \mathcal{F}_\alpha} \sum_{i=1}^T \ell(h, s_i) + \inf_{h \in \mathcal{F}_\alpha} \sum_{i=1}^T \ell(h, s_i) - \inf_{h \in \mathcal{F}} \sum_{i=1}^T \ell(h, s_i) \right] \\ & \leq 2\alpha T + \mathbb{E} \left[ \sum_{t=1}^T \ell(h_{t+1}, s_t) - \inf_{h \in \mathcal{F}_\alpha} \sum_{i=1}^T \ell(h, s_i) \right] \end{aligned} \quad (13)$$

$$\leq 2\alpha T + \mathbb{E} \left[ \sum_{t=1}^N \ell(h_t, \tilde{s}_t) - \ell(h^*, \tilde{s}_t) \right] \quad (14)$$

$$\leq 2\alpha T + \mathbb{E} \left[ \sup_{h \in \mathcal{F}_\alpha} \sum_{t=1}^N \ell(h, \tilde{s}_t) - \ell(h^*, \tilde{s}_t) \right]$$

640 where  $h^* = \inf_{h \in \mathcal{F}_\alpha} \sum_{i=1}^T \ell(h, s_i)$ . (13) follows by comparing the optimal of the truncated class  
641 with the whole class, see [Cesa-Bianchi and Lugosi, 2006, Lemma 9.5]. (14) follows from the  
642 Be-the-leader lemma Cesa-Bianchi and Lugosi [2006].  $\square$

## 643 F Proof of Lemma 4.3

644 Denote by  $R^{(t)} = (N^{(t)}, \{\tilde{s}_i\}_{i \in N^{(t)}})$  the fresh randomness generated at the beginning of time  $t$ ,  
645 which is independent of  $\{s_\tau\}_{\tau < t}$  generated by the adversary. Let  $\mathcal{Q}_t$  be the distribution of the  
646 learner's action  $h_t \in \mathcal{H}$  in Algorithm 1. Formally,

$$r^t(x) = \sum_{i=1}^{N^{(t+1)}} \tilde{y}_i^{(t+1)} \cdot \mathbf{1}(\tilde{x}_i^{(t+1)} = x) + \sum_{\tau=1}^t y_\tau \cdot \mathbf{1}(x_\tau = x).$$

647 Let  $\mathcal{P}^t$  be the distribution of  $r^t$ . The reason why we introduce this notion is that  $h_t$  in Algorithm 1  
648 only depends on the vector  $r^{t-1}$ .

649 The main step in the proof is to introduce an independent sample from the distribution  $\mathcal{D}_t$  in order to  
650 decouple the dependence of the distribution  $\mathcal{Q}_{t+1}$  on the test point  $s_t$ .

$$\begin{aligned} & \mathbb{E}_{s_t \sim \mathcal{D}_t} \mathbb{E}_{h_t \sim \mathcal{Q}_t} [\ell(h_t, s_t)] - \mathbb{E}_{s_t \sim \mathcal{D}_t} \mathbb{E}_{h_{t+1} \sim \mathcal{Q}_{t+1}} [\ell(h_{t+1}, s_t)] \\ & = \mathbb{E}_{s_t \sim \mathcal{D}_t} \mathbb{E}_{h_t \sim \mathcal{Q}_t} [\ell(h_t, s_t)] - \mathbb{E}_{s_t, s'_t \sim \mathcal{D}_t} \mathbb{E}_{h_{t+1} \sim \mathcal{Q}_{t+1}} [\ell(h_{t+1}, s'_t)] \\ & \quad + \mathbb{E}_{s_t, s'_t \sim \mathcal{D}_t} \mathbb{E}_{h_{t+1} \sim \mathcal{Q}_{t+1}} [\ell(h_{t+1}, s'_t)] - \mathbb{E}_{s_t \sim \mathcal{D}_t} \mathbb{E}_{h_{t+1} \sim \mathcal{Q}_{t+1}} [\ell(h_{t+1}, s_t)] \end{aligned} \quad (15)$$

$$\begin{aligned} & = \mathbb{E}_{s'_t \sim \mathcal{D}_t} \mathbb{E}_{h_t \sim \mathcal{Q}_t} [\ell(h_t, s'_t)] - \mathbb{E}_{s'_t \sim \mathcal{D}_t} \mathbb{E}_{h_{t+1} \sim \mathbb{E}_{s_t \sim \mathcal{D}_t} [\mathcal{Q}_{t+1}]} [\ell(h_{t+1}, s'_t)] \\ & \quad + \mathbb{E}_{s_t, s'_t \sim \mathcal{D}_t} \mathbb{E}_{h_{t+1} \sim \mathcal{Q}_{t+1}} [\ell(h_{t+1}, s'_t)] - \mathbb{E}_{s_t \sim \mathcal{D}_t} \mathbb{E}_{h_{t+1} \sim \mathcal{Q}_{t+1}} [\ell(h_{t+1}, s_t)] \end{aligned} \quad (16)$$

651 where we get (15) by adding and subtracting the middle term corresponding to evaluating the loss  
652 on an independent sample  $s'_t$  and (16) by observing that  $s_t$  and  $s'_t$  are equally distributed. Since the  
653 second term is the same in the required equation, we can focus on the first term.

$$\mathbb{E}_{h_t \sim \mathcal{Q}_t} \left[ \mathbb{E}_{s'_t \sim \mathcal{D}_t} [\ell(h_t, s'_t)] \right] - \mathbb{E}_{h_{t+1} \sim \mathcal{Q}_{t+1}} \left[ \mathbb{E}_{s'_t \sim \mathcal{D}_t} [\ell(h_{t+1}, s'_t)] \right]. \quad (17)$$

Here we use the notation  $\widetilde{\mathcal{Q}_{t+1}} = \mathbb{E}_{s_t \sim \mathcal{D}_t} [\mathcal{Q}_{t+1}]$  for the mixture distribution. In order to bound this, we look a variational interpretation of the  $\chi^2$  distance between two distributions  $P$  and  $Q$ .

**Lemma F.1** (Hammersley–Chapman–Robbins bound). *For any pair of measures  $P$  and  $Q$  and any measurable function  $h : \mathcal{X} \rightarrow \mathbb{R}$ , we have*

$$\begin{aligned} |\mathbb{E}_{X \sim P}[h(X)] - \mathbb{E}_{X \sim Q}[h(X)]| &\leq \sqrt{\chi^2(P, Q) \cdot \text{Var}_{X \sim Q}(h(X))} \\ &\leq \sqrt{\frac{1}{2} \chi^2(P, Q) \cdot \mathbb{E}_{X, X' \sim Q}(h(X) - h(X'))^2}. \end{aligned}$$

Applying this to (17), we get

$$\begin{aligned} &\mathbb{E}_{h_t \sim \mathcal{Q}_t} \left[ \mathbb{E}_{s'_t \sim \mathcal{D}_t} [\ell(h_t, s'_t)] \right] - \mathbb{E}_{h_{t+1} \sim \widetilde{\mathcal{Q}_{t+1}}} \left[ \mathbb{E}_{s'_t \sim \mathcal{D}_t} [\ell(h_{t+1}, s'_t)] \right] \\ &\leq \sqrt{\frac{1}{2} \chi^2(\mathbb{E}_{s_t \sim \mathcal{D}_t} [\mathcal{Q}_{t+1}], \mathcal{Q}_t) \cdot \mathbb{E}_{h_t, h'_t \sim \mathcal{Q}_t} (\mathbb{E}_{s_t \sim \mathcal{D}_t} [\ell(h_t, s_t) - \ell(h'_t, s_t)])^2}. \end{aligned}$$

as required. As noted before, for the particular use in our analysis a simpler version of the lemma similar to Haghtalab et al. [2022] suffices but we include the general version since we believe such a version is useful in providing improved regret bounds for the problem.

## G Upper Bounding $\chi^2$ Distance: Proof of Lemma 4.4

In this section, we will focus on bounding the  $\chi^2$  distance between the distribution of actions at time steps. The reasoning in this section closely follows Haghtalab et al. [2022]. We reproduce it here for completeness.

We assume that  $\mathcal{X}$  is discrete. Define

$$n_0(x) = \sum_{i=1}^N \mathbf{1}(\tilde{x}_i = x, \tilde{y}_i = 0) \quad \text{and} \quad n_1(x) = \sum_{i=1}^N \mathbf{1}(\tilde{x}_i = x, \tilde{y}_i = 1).$$

As each  $\tilde{x}_i$  is uniformly distributed on  $\mathcal{X}$  and  $\tilde{y}_i \sim \mathcal{U}(\{0, 1\})$ , by the subsampling property of the Poisson distribution, the  $2|\mathcal{X}|$  random variables  $\{n_0(x), n_1(x)\}_{x \in \mathcal{X}}$  are i.i.d. distributed as  $\text{Poi}(n/2|\mathcal{X}|)$ .

Since the historic data is only a translation, it suffices to consider the distributions at time  $t = 0$  and  $t = 1$ . Let  $n_0^1(x) = n_0(x) + \mathbf{1}(x_1 = x, y_1 = 0)$  with  $n_1^1$  defined similarly. Let  $P$  and  $Q$  be the probability distributions of  $\{n_0(x), n_1(x)\}_{x \in \mathcal{X}}$  and  $\{n_0^1(x), n_1^1(x)\}_{x \in \mathcal{X}}$ , respectively. Note that the output of the oracle depends only on this vector and thus by the data processing inequality it suffices to bound  $\chi^2(P, Q)$ .

Note that the distribution  $P$  is a product Poisson distribution:

$$P(\{n_0(x), n_1(x)\}) = \prod_{x \in \mathcal{X}} \prod_{y \in \{0, 1\}} \mathbb{P}(\text{Poi}(n/2|\mathcal{X}|) = n_y(x)).$$

As for the distribution  $Q$ , it could be obtained from  $P$  in the following way: the smooth adversary draws  $x^* \sim \mathcal{D}$ , independent of  $\{n_0(x), n_1(x)\}_{x \in \mathcal{X}} \sim P$ , for some  $\sigma$ -smooth distribution  $\mathcal{D} \in \Delta_\sigma(\mathcal{X})$ . He then chooses a label  $y^* = y(x^*) \in \{0, 1\}$  as a function of  $x^*$ , and sets

$$n_{y(x^*)}^1(x^*) = n_{y(x^*)}(x^*) + 1, \quad \text{and} \quad n_y^1(x) = n_y(x), \quad \forall (x, y) \neq (x^*, y(x^*)).$$

Consequently, given a  $\sigma$ -smooth distribution  $\mathcal{D}$  and a labeling function  $y : \mathcal{X} \rightarrow \{0, 1\}$  used by the adversary, the distribution  $Q$  is a mixture distribution  $Q = \mathbb{E}_{x^* \sim \mathcal{D}^\mathcal{X}} [Q_{x^*}]$ , with

$$Q_{x^*}(\{n_0^1(x), n_1^1(x)\}) = \mathbb{P}(\text{Poi}(n/2|\mathcal{X}|) = n_{y(x^*)}(x^*) - 1) \times \prod_{(x, y) \neq (x^*, y(x^*))} \mathbb{P}(\text{Poi}(n/2|\mathcal{X}|) = n_y(x)).$$

We will use the Ingster method to control the  $\chi^2$  between the mixture distribution  $Q$  and the base distribution  $P$ .

682 **Lemma G.1** (Ingster’s  $\chi^2$  method). *For a mixture distribution  $\mathbb{E}_{\theta \sim \pi}[Q_\theta]$  and a generic distribution*  
 683  *$P$ , the following identity holds:*

$$\chi^2 \left( \mathbb{E}_{\theta \sim \pi}[Q_\theta], P \right) = \mathbb{E}_{\theta, \theta' \sim \pi} \left[ \mathbb{E}_{x \sim P} \left( \frac{Q_\theta(x) Q_{\theta'}(x)}{P(x)^2} \right) \right] - 1,$$

684 where  $\theta'$  is an independent copy of  $\theta$ .

685 Let  $x_1^*, x_2^*$  be an arbitrary pair of instance. Using the closed-form expressions of distributions  $P$  and  
 686  $Q_{x^*}$ , it holds that

$$\frac{Q_{x_1^*} Q_{x_2^*}}{P^2} = \frac{2|\mathcal{X}| n_{y(x_1^*)}(x_1^*)}{n} \cdot \frac{2|\mathcal{X}| n_{y(x_2^*)}(x_2^*)}{n}.$$

687 Using the fact that  $\{n_0(x), n_1(x)\}_{x \in \mathcal{X}}$  are i.i.d. distributed as  $\text{Poi}(n/2|\mathcal{X}|)$  under  $P$ , we have

$$\mathbb{E}_{\{n_0(x), n_1(x)\} \sim P} \left( \frac{Q_{x_1^*}(\{n_0^1(x), n_1^1(x)\}) Q_{x_2^*}(\{n_0^1(x), n_1^1(x)\})}{P(\{n_0(x), n_1(x)\})^2} \right) = 1 + \frac{2|\mathcal{X}|}{n} \cdot \mathbf{1}(x_1^* = x_2^*).$$

688 We will use the fact that the probability of collision between two independent draws  $x_1^*, x_2^* \sim \mathcal{D}$  is  
 689 small. That is using the **Lemma G.1**, we have

$$\begin{aligned} \sqrt{\frac{\chi^2(Q, P)}{2}} &= \sqrt{\frac{\chi^2(\mathbb{E}_{x^* \sim \mathcal{D}}[Q_{x^*}], P)}{2}} = \sqrt{\frac{|\mathcal{X}|}{n} \cdot \mathbb{E}_{x_1^*, x_2^* \sim \mathcal{D}}[\mathbf{1}(x_1^* = x_2^*)]} \\ &= \sqrt{\frac{|\mathcal{X}|}{n} \sum_{x \in \mathcal{X}} \mathcal{D}(x)^2} \leq \sqrt{\frac{|\mathcal{X}|}{n} \sum_{x \in \mathcal{X}} \mathcal{D}(x) \cdot \frac{1}{\sigma|\mathcal{X}|}} = \frac{1}{\sqrt{\sigma n}}, \end{aligned}$$

690 where the last inequality follows from the definition of a  $\sigma$ -smooth distribution.

## 691 **H Upper Bounding Generalization Error: Proof of Lemma 4.5**

692 The proof of the theorem is similar to the [Haghtalab et al., 2022, Section 4.2.2]. In our setting, we  
 693 need to deal with general losses. We shall need the following property of smooth distributions which  
 694 is a slightly strengthened version of the coupling lemma in **Theorem 2.1** shown in Haghtalab et al.  
 695 [2022].

696 **Lemma H.1.** *Let  $X_1, \dots, X_m \sim Q$  and  $P$  be another distribution with a bounded likelihood ratio:*  
 697  *$dP/dQ \leq 1/\sigma$ . Then using external randomness  $R$ , there exists an index  $I = I(X_1, \dots, X_m, R) \in$*   
 698  *$[m]$  and a success event  $E = E(X_1, \dots, X_m, R)$  such that  $\Pr[E^c] \leq (1 - \sigma)^m$ , and*

$$(X_I \mid E, X_{\setminus I}) \sim P.$$

699 Fix any realization of the Poissonized sample size  $N \sim \text{Poi}(n)$ . Choose  $m$  in **Lemma H.1**. Since for  
 700 any  $\sigma$ -smooth  $\mathcal{D}_t$ , it holds that

$$\frac{\mathcal{D}_t(s)}{\mathcal{U}(\mathcal{X} \times \{0, 1\})(s)} = \frac{\mathcal{D}_t(x)}{\mathcal{U}(\mathcal{X})(x)} \cdot \frac{\mathcal{D}_t(y \mid x)}{\mathcal{U}(\{0, 1\})(y)} \leq \frac{2}{\sigma},$$

701 the premise of **Lemma H.1** holds with parameter  $\sigma/2$  for  $P = \mathcal{D}_t, Q = \mathcal{U}(\mathcal{X} \times \{0, 1\})$ . Consequently,  
 702 dividing the self-generated samples  $\tilde{s}_1, \dots, \tilde{s}_N$  into  $N/m$  groups each of size  $m$ , and running the  
 703 procedure in **Lemma H.1**, we arrive at  $N/m$  independent events  $E_1, \dots, E_{N/m}$ , each with probability  
 704 at least  $1 - (1 - \sigma/2)^m \geq 1 - T^{-2}$ . Moreover, conditioned on each  $E_j$ , we can pick an element  
 705  $u_j \in \{\tilde{s}_{(j-1)m+1}, \dots, \tilde{s}_{jm}\}$  such that

$$(u_j \mid E_j, \{\tilde{s}_{(j-1)m+1}, \dots, \tilde{s}_{jm}\} \setminus \{u_j\}) \sim \mathcal{D}_t.$$

706 For notational simplicity we denote the set of unpicked samples  $\{\tilde{s}_{(j-1)m+1}, \dots, \tilde{s}_{jm}\} \setminus \{u_j\}$  by  $v_j$ .  
 707 As a result, thanks to the mutual independence of different groups and  $s_t \sim \mathcal{D}_t$  conditioned on  $s_{1:t-1}$   
 708 (note that we draw fresh randomness at every round), for  $E \triangleq \bigcap_{j \in [N/m]} E_j$  we have

$$(u_1, \dots, u_{N/m}, s_t) \mid (E, s_{1:t-1}, v_1, \dots, v_{N/m}) \stackrel{\text{iid}}{\sim} \mathcal{D}_t.$$

Let us denote  $h_{t+1} = O_{t+1}(\tilde{s}_1, \dots, \tilde{s}_N, s_{1:t-1}, s_t)$  the output of the algorithm at time  $t$  when  $\tilde{s}_1, \dots, \tilde{s}_N$  denotes the hallucinated data points and  $s_{1:t-1}, s_t$  denotes the observed data points. We will use the fact that  $O_{t+1}$  is a permutation invariant function. Consequently, for each  $j \in [N/m]$  we have

$$\begin{aligned}
& \mathbb{E}_{s_t \sim \mathcal{D}_t, R^{(t+1)}} [\ell(h_{t+1}, s_t) \mid E] \\
&= \mathbb{E}_{s_t \sim \mathcal{D}_t, \tilde{s}_1, \dots, \tilde{s}_N} [\ell(O_{t+1}(\tilde{s}_1, \dots, \tilde{s}_N, s_{1:t-1}, s_t), s_t) \mid E] \\
&= \mathbb{E}_{v, s_{1:t-1} \mid E} \left( \mathbb{E}_{s_t, u_1, \dots, u_{N/m}} [\ell(O_{t+1}(s_{1:t-1}, v, u_1, \dots, u_{N/m}, s_t), s_t) \mid E, s_{1:t-1}, v] \right) \\
&= \mathbb{E}_{v, s_{1:t-1} \mid E} \left( \mathbb{E}_{s_t, u_1, \dots, u_{N/m}} [\ell(O_{t+1}(s_{1:t-1}, v, u_1, \dots, u_{j-1}, s_t, u_{j+1}, \dots, u_{N/m}, u_j), u_j) \mid E, s_{1:t-1}, v] \right) \\
&= \mathbb{E}_{v, s_{1:t-1} \mid E} \left( \mathbb{E}_{s_t, u_1, \dots, u_{N/m}} [\ell(O_{t+1}(s_{1:t-1}, v, u_1, \dots, u_{N/m}, s_t), u_j) \mid E, s_{1:t-1}, v] \right) \\
&= \mathbb{E}_{s_t \sim \mathcal{D}_t, R^{(t+1)}} [\ell(h_{t+1}, u_j) \mid E], \tag{19}
\end{aligned}$$

where (18) follows from the conditional iid (and thus exchangeable) property of  $(u_1, \dots, u_{N/m}, s_t)$  after the conditioning, and (19) is due to the invariance of the  $O_{t+1}$  after any permutation of the inputs. On the other hand, if  $s'_t, u'_1, \dots, u'_{N/m}$  are independent copies of  $s_t \sim \mathcal{D}_t$ , by independence it is clear that

$$\mathbb{E}_{s_t, s'_t \sim \mathcal{D}_t, R^{(t+1)}} [\ell(h_{t+1}, s'_t) \mid E] = \mathbb{E}_{s_t, s'_t \sim \mathcal{D}_t, R^{(t+1)}} [\ell(h_{t+1}, u'_j) \mid E], \quad \forall j \in [N/m].$$

Consequently, using the shorthand  $u_0 = s_t, u'_0 = s'_t$ , we have

$$\begin{aligned}
& \mathbb{E}_{s_t, s'_t \sim \mathcal{D}_t, R^{(t+1)}} [\ell(h_{t+1}, s'_t) - \ell(h_{t+1}, s_t) \mid E] \\
&= \frac{1}{N/m + 1} \mathbb{E}_{s_t, s'_t \sim \mathcal{D}_t, R^{(t+1)}} \left[ \sum_{j=0}^{N/m} (\ell(h_{t+1}, u'_j) - \ell(h_{t+1}, u_j)) \mid E \right] \\
&\leq \frac{1}{N/m + 1} \mathbb{E}_{u_0, \dots, u_{N/m}, u'_0, \dots, u'_{N/m} \sim \mathcal{D}_t} \left[ \sup_{h \in \mathcal{F}_\alpha} \sum_{j=0}^{N/m} (\ell(h, u'_j) - \ell(h, u_j)) \right] \\
&\leq \frac{2\alpha}{N/m + 1} \mathbb{E}_{u_0, \dots, u_{N/m} \sim \mathcal{D}_t} \mathbb{E}_{\epsilon_1, \dots, \epsilon_{N/m}} \left[ \sup_{h \in \mathcal{F}_\alpha} \sum_{j=0}^{N/m} \epsilon_j h(u_j) \right] \\
&\leq \frac{1}{\alpha} \text{Rad}(\mathcal{F}_\alpha, N/m).
\end{aligned}$$

The last inequality uses the fact that the algorithm always outputs a function in  $\mathcal{F}_\alpha$ . Further, we have used the Ledoux-Talagrand contraction inequality.

**Theorem H.2** (Ledoux-Talagrand Contraction). *Let  $g : \mathbb{R} \rightarrow \mathbb{R}$  be a  $L$ -Lipschitz function. For a function class  $\mathcal{F}$ , denote by  $g \circ \mathcal{F}$  the compositions of function in  $\mathcal{F}$  with  $g$ . Then, for all  $n$ ,*

$$\text{Rad}(g \circ \mathcal{F}, n) \leq L \cdot \text{Rad}(\mathcal{F}, n).$$

Last inequality follows from the fact that the derivative of the log loss is bounded by  $1/\alpha$  when truncated at level  $\alpha$ . Note that the union bound gives

$$\Pr[E^c] \leq \sum_{j=1}^{N/m} \Pr[E_j^c] \leq \frac{N(1-\sigma)^m}{m}.$$

Thus, the law of total expectation gives

$$\mathbb{E}_{s_t, s'_t \sim \mathcal{D}_t, R^{(t+1)}} [\ell(h_{t+1}, s'_t) - \ell(h_{t+1}, s_t)]$$

$$\begin{aligned}
&\leq \mathbb{E}_{s_t, s'_t \sim \mathcal{D}_t, R^{(t+1)}} [\ell(h_{t+1}, s'_t) - \ell(h_{t+1}, s_t) \mid E] + \Pr[E^c] \log(1/\alpha) \\
&\leq \frac{1}{\alpha} \text{Rad}(\mathcal{F}_\alpha, N/m) + \frac{N(1-\sigma)^m \log(1/\alpha)}{m}.
\end{aligned}$$

725 The last equation follows from the fact that the output of the algorithm has loss always bounded by  
726  $\log(1/\alpha)$ .

727 We get the desired result by taking the expectation of  $N \sim \text{Poi}(n)$ , and using  $\Pr[N > n/2] \geq$   
728  $1 - e^{-n/8}$  in the above inequality completes the proof.

## 729 I Bound on the Perturbation Term

**Lemma I.1** (Perturbation).

$$\mathbb{E} \left[ \sum_{i=1}^N L(\hat{h}, \tilde{s}_t) - L(h^*, \tilde{s}_t) \right] \leq n \log \alpha$$

730 *Proof.* Note from the truncation step in **Algorithm 1**, we have that  $L(\hat{h}, \tilde{s}_t) \leq \log(\alpha)$ . We get the  
731 desired bound by taking expectations.  $\square$
